# Supplementary material for: Clustering of Ca2+ transients in interstitial cells of Cajal defines slow wave duration
Source: PubMed Central journal article supplement — J Gen Physiol. 2017 Jul 3;149(7):703–25. doi: 10.1085/jgp.201711771 (PMC5496507; doi:10.1085/jgp.201711771), 2017-07-03
Supplement: JGP_201711771_sm.pdf [file JGP_201711771_sm.pdf]

SUPPLEMENTAL MATERIAL

Drumm et al., <https://doi.org/10.1085/jgp.201711771>

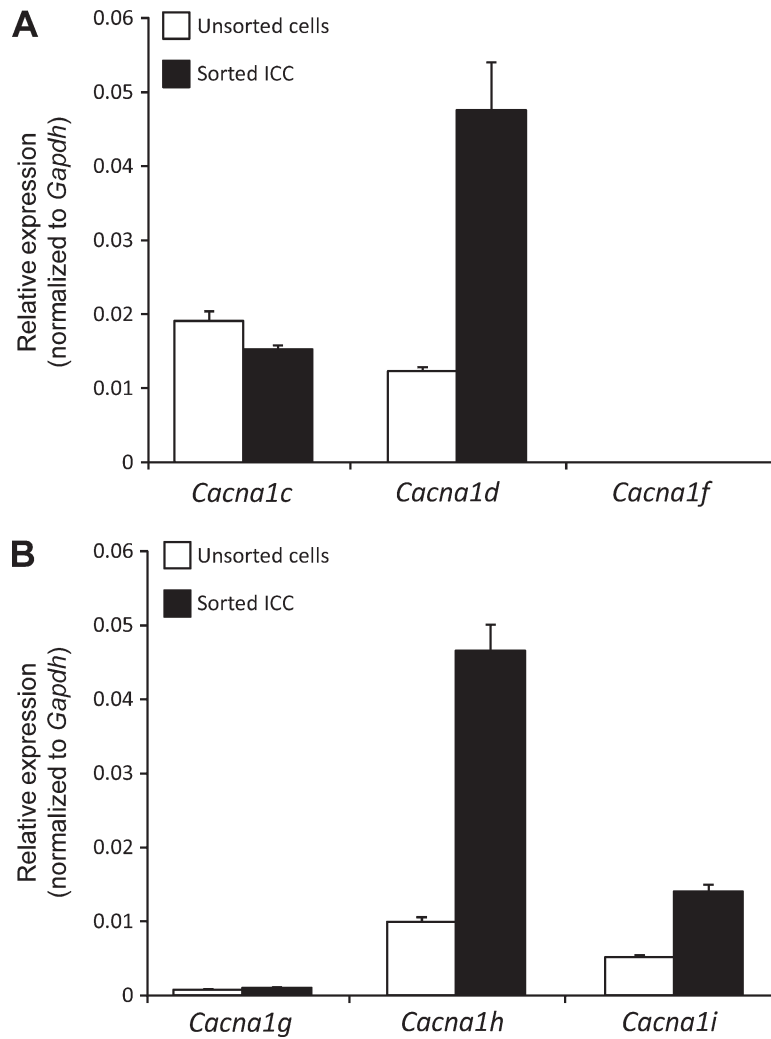

Figure S1. **Molecular expression of voltage-dependent Ca<sup>2+</sup> channels (L- and T-type) transcripts in ICC.** (A) Relative expression of L-type Ca<sup>2+</sup> channel isoforms (*Cacna1c*, *Cacna1d*, and *Cacna1f*) in sorted ICC and in unsorted cells (i.e., mixed cell population after enzymatic dispersions of jejunal muscles) as determined by qPCR. Transcripts of L-type Ca<sup>2+</sup> channel isoforms *Cacna1c* and *Cacna1d* were resolved in sorted ICC; however, the highest isoform expressed in ICC was *Cacna1d*. *Cacna1f* expression was not resolved in ICC. (B) Relative expression levels of T-type Ca<sup>2+</sup> channel isoforms (*Cacna1g*, *Cacna1h*, and *Cacna1i*) in sorted ICC in comparison with unsorted cells. The relative expression of each gene was normalized to the house-keeping gene, *Gapdh*. The data are plotted with as mean ± SEM and derived from experiments on four tissues of four animals that were dispersed and sorted separately, and then qPCR was performed on each individual sample.

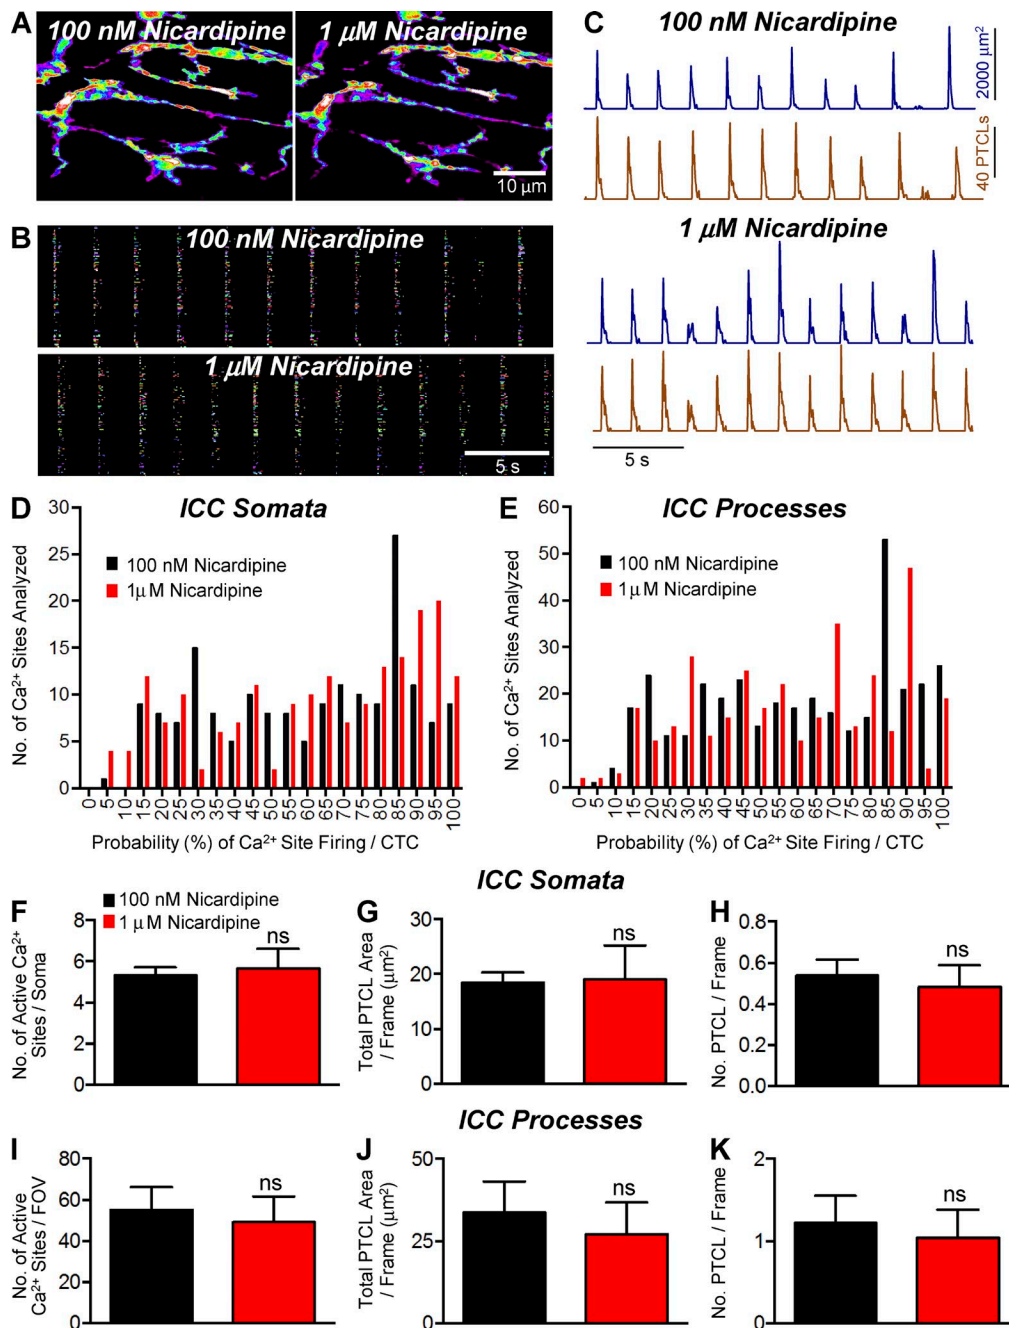

Figure S2. **The effect of nicardipine on  $\text{Ca}^{2+}$  transients in ICC-MY.** (A) Representative heat map showing the summated PTCLs of ICC-MY in control (100 nM nicardipine) and 1  $\mu\text{M}$  nicardipine. (B) Occurrence map of individually color coded  $\text{Ca}^{2+}$  firing sites in the ICC-MY network in control and 1  $\mu\text{M}$  nicardipine conditions. (C) Traces of PTCL activity over an entire recording of the ICC-MY network in control conditions and in the presence of nicardipine (1  $\mu\text{M}$ ) showing PTCL area (dark blue) and PTCL count (brown). (D and E) Histogram showing the probability (%) that an individual  $\text{Ca}^{2+}$  firing site in the ICC-MY cell soma and cell processes in E will fire during a CTC cycle in the presence of nicardipine (1  $\mu\text{M}$ ; red bars) compared with control conditions (black bars;  $n = 5$ , FOV = 7). (F) Summary showing that the number of  $\text{Ca}^{2+}$  firing sites in cell soma was not significantly affected by nicardipine (1  $\mu\text{M}$ ;  $P = 0.59$ ). (G) PTCL area/frame in the cell soma was  $18.4 \pm 1.8 \mu\text{m}^2$  in control and  $19 \pm 6.2 \mu\text{m}^2$  in nicardipine (1  $\mu\text{M}$ ;  $P = 0.92$ ,  $n = 5$ , FOV = 7). (H) The PTCL count/frame in the cell soma was  $0.5 \pm 0.08$  in control and  $0.5 \pm 0.1$  in nicardipine (1  $\mu\text{M}$ ;  $P = 0.57$ ,  $n = 5$ , FOV = 7). (I) The number of  $\text{Ca}^{2+}$  firing sites in the cell processes per FOV changed from  $55 \pm 11.1$  in control to  $49.4 \pm 12.5$  in nicardipine (1  $\mu\text{M}$ ;  $P = 0.29$ ,  $n = 5$ , FOV = 7). (J) PTCL area/frame in the cell processes was  $33.6 \pm 9.5 \mu\text{m}^2$  in control and  $27.1 \pm 9.7 \mu\text{m}^2$  in nicardipine (1  $\mu\text{M}$ ;  $P = 0.19$ ,  $n = 5$ , FOV = 7). (K) The PTCL count/frame in the cell processes was  $1.2 \pm 0.3$  in control and  $1 \pm 0.3$  in nicardipine (1  $\mu\text{M}$ ;  $P = 0.12$ ,  $n = 5$ , FOV = 7). ns,  $P > 0.05$ . Mean  $\pm$  SE is shown.

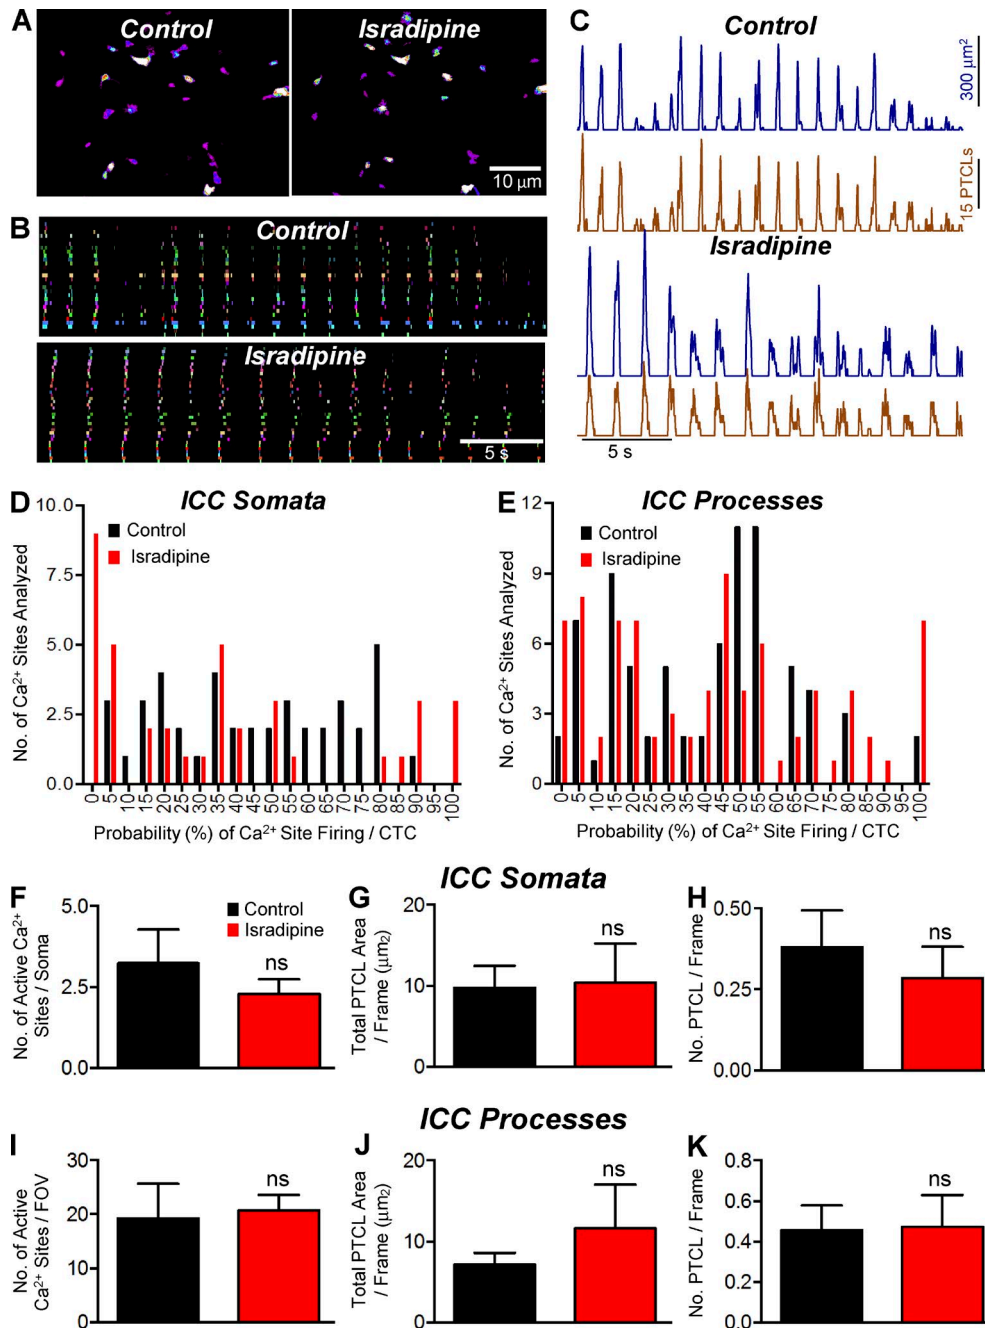

Figure S3. **The effect of isradipine on Ca<sup>2+</sup> transients in ICC-MY.** (A) Representative heat map showing the summated PTCLs of ICC-MY in control and 1 μM isradipine. (B) Occurrence map of individually color-coded Ca<sup>2+</sup> firing sites in the ICC-MY network in control and isradipine conditions. (C) Traces of PTCL activity over an entire recording of the ICC-MY network in control conditions and in the presence of isradipine (1 μM) showing PTCL area (dark blue) and PTCL count (brown). (D and E) Histogram showing the probability (%) that an individual Ca<sup>2+</sup> firing site in the ICC-MY cell soma and cell processes in E will fire during a CTC cycle in the presence of isradipine (1 μM; red bars) compared with control conditions (black bars;  $n = 4$ , FOV = 4). (F) Summary showing that the number of Ca<sup>2+</sup> firing sites in cell soma was not significantly affected by isradipine (1 μM;  $P = 0.43$ ). (G) PTCL area/frame in the cell soma was  $9.8 \pm 2.7 \mu\text{m}^2$  in control and  $10.4 \pm 4.9 \mu\text{m}^2$  in isradipine (1 μM;  $P = 0.91$ ,  $n = 4$ , FOV = 4). (H) The PTCL count/frame in the cell soma was  $0.4 \pm 0.1$  in control and  $0.3 \pm 0.09$  in isradipine (1 μM;  $P = 0.57$ ,  $n = 4$ , FOV = 4). (I) The number of Ca<sup>2+</sup> firing sites in the cell processes per FOV changed from  $19.3 \pm 6.4$  in control to  $20.75 \pm 2.8$  in isradipine (1 μM;  $P = 0.83$ ,  $n = 4$ , FOV = 4). (J) PTCL area/frame in the cell processes was  $7.1 \pm 1.4 \mu\text{m}^2$  in control and  $11.6 \pm 5.4 \mu\text{m}^2$  in isradipine (1 μM;  $P = 0.45$ ,  $n = 4$ , FOV = 4). (K) The PTCL count/frame in the cell processes was  $0.46 \pm 0.1$  in control and  $0.5 \pm 0.16$  in isradipine (1 μM;  $P = 0.93$ ,  $n = 4$ , FOV = 4). ns,  $P > 0.05$ . Mean ± SE is shown.

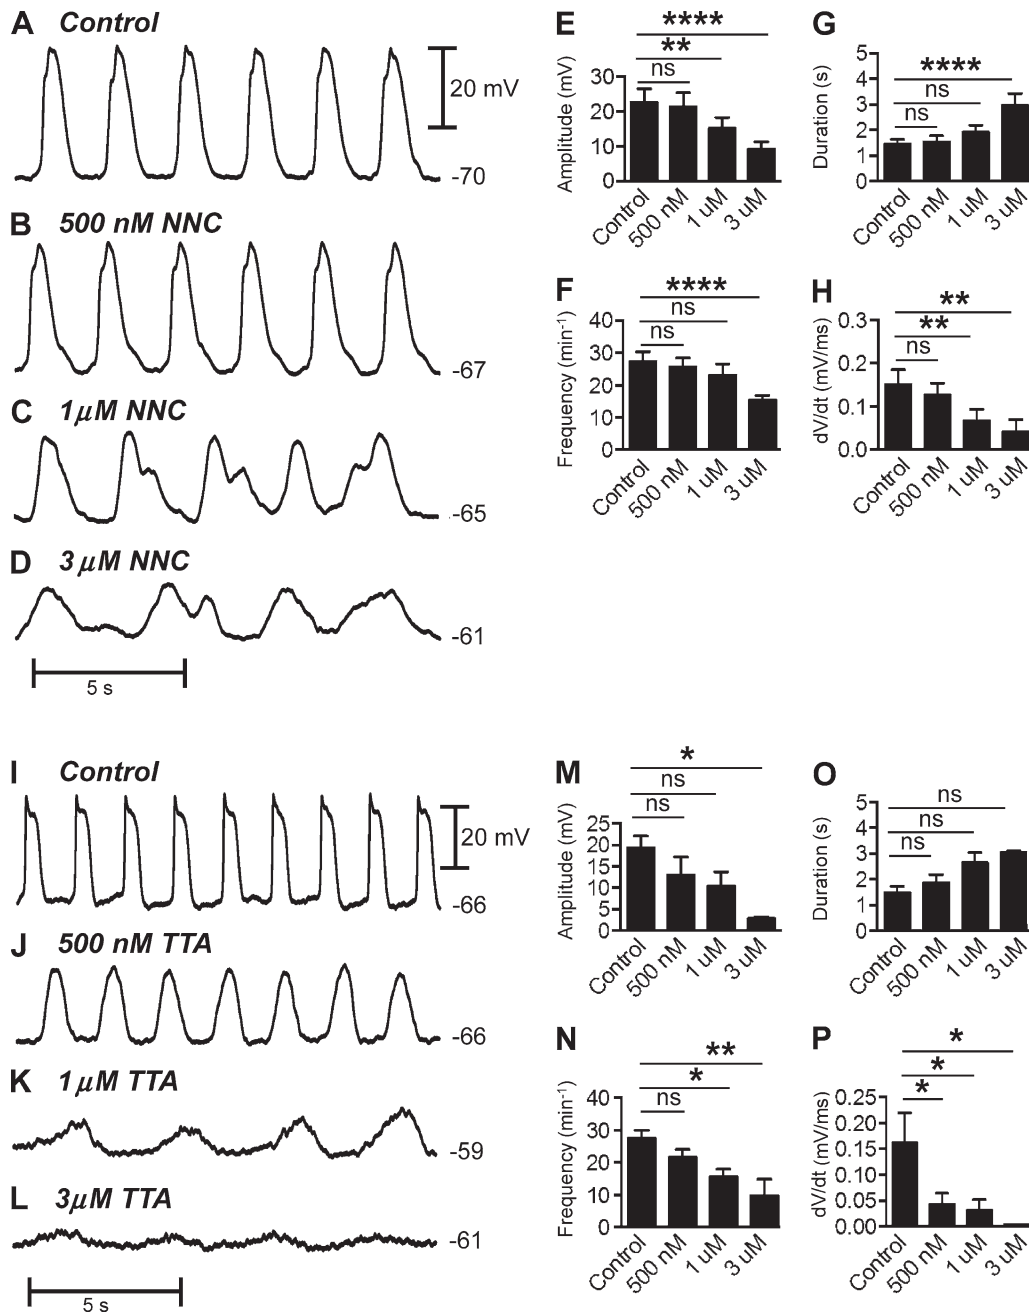

Figure S4. **The effect of the T-type  $\text{Ca}^{2+}$  channel blockers on electrical slow wave activity.** (A) Representative recording from small intestine muscles displaying spontaneous electrical slow waves. (B–D) Representative traces showing the effect of 500 nM NNC 55-0396 (B), 1  $\mu\text{M}$  NNC 55-0396 (C), and 3  $\mu\text{M}$  NNC 55-0396 (D) on slow waves. Note that the time scale in D and the amplitude scale in A pertain to A–D. (E–H) Summary data showing the effect of increasing concentrations of NNC 55-0396 on slow wave amplitude (mV), frequency ( $\text{min}^{-1}$ ), duration (s), and  $dV/dt$  (mV/ms), respectively ( $n = 5$ ). (I) Representative electrical recording of jejunal slow waves. (J–L) Representative traces showing the effect of TTA-A2 on slow waves at 500 nM (J), 1  $\mu\text{M}$  (K), and 3  $\mu\text{M}$  (L). The time scale in L and the amplitude scale in J pertain to L–J. (M–P) Summary data showing dose response relationships of the effect of increasing concentrations of TTA-A2 on slow wave amplitude (mV), frequency ( $\text{min}^{-1}$ ), duration (s), and  $dV/dt$  (mV/ms;  $n = 6$ ). ns,  $P > 0.05$ ; \*,  $P < 0.05$ ; \*\*,  $P < 0.01$ ; \*\*\*\*,  $P < 0.0001$ . Mean  $\pm$  SE is shown.

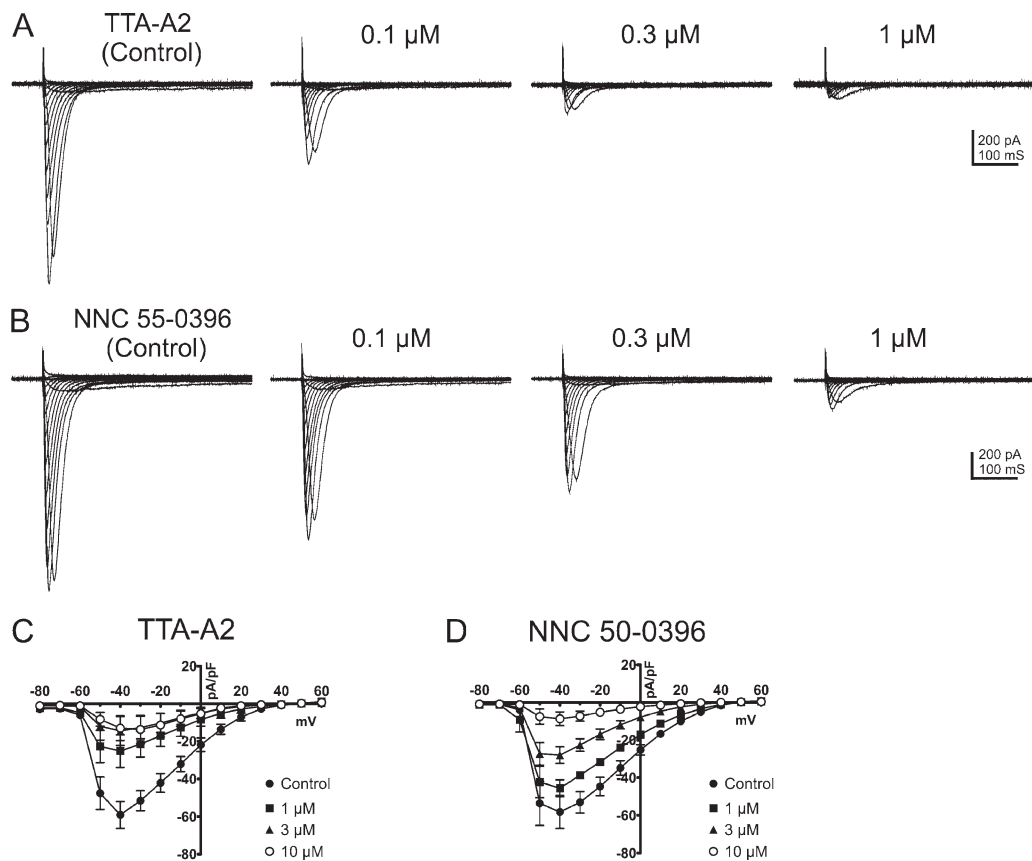

Figure S5. **Effects of T-type  $\text{Ca}^{2+}$  channel blockers on  $\text{Ca}_v3.2$  currents.** (A) Representative traces showing TTA-A2 effects on  $\text{Ca}_v3.2$  currents in HEK293 cells. Currents were evoked by step protocol from  $-80$  to  $60$  mV in  $10$ -mV increments from a holding potential of  $-80$  mV. (B) Representative traces showing NNC 55-0396 effects on  $\text{Ca}_v3.2$  currents in HEK293 cells. Currents were evoked by step protocol from  $-80$  to  $60$  mV in  $10$ -mV increments from a holding potential of  $-80$  mV. (C and D) Current-voltage (I-V) relationships for  $\text{Ca}_v3.2$  currents was normalized to cell size (pF) in the presence of TTA-A2 (C) and NNC 55-0396 (D). Results from five cells are displayed as means  $\pm$  SEM.

Table S1. **Quantifying the effects of nicardipine on CTCs in ICC-MY**

| CTC parameters                                                        | 100 nM NICRD   | 1 $\mu\text{M}$ NICRD | 3 $\mu\text{M}$ NICRD |
|-----------------------------------------------------------------------|----------------|-----------------------|-----------------------|
| Probability (%) of $\text{Ca}^{2+}$ site firing/CTC cycle (soma)      | $60.4 \pm 2$   | $62.4 \pm 2.1$        | $40.7 \pm 2.6$        |
| Probability (%) of $\text{Ca}^{2+}$ site firing/CTC cycle (processes) | $61 \pm 1.4$   | $55.5 \pm 1.5$        | $32.9 \pm 1.7$        |
| No. of $\text{Ca}^{2+}$ sites/soma                                    | $5.3 \pm 0.4$  | $5.7 \pm 0.9$         | $4.3 \pm 1.2$         |
| No. of $\text{Ca}^{2+}$ sites/process FOV                             | $55 \pm 11.1$  | $49.4 \pm 12.5$       | $39.1 \pm 11.3$       |
| PTCL area/frame ( $\mu\text{m}^2$ ) soma                              | $18.4 \pm 1.8$ | $19 \pm 6.2$          | $10.2 \pm 4.7$        |
| PTCL area/frame ( $\mu\text{m}^2$ ) processes                         | $33.6 \pm 9.5$ | $27.1 \pm 9.7$        | $14.2 \pm 5.4$        |
| PTCL count/frame soma                                                 | $0.5 \pm 0.08$ | $0.5 \pm 0.1$         | $0.3 \pm 0.1$         |
| PTCL count/frame processes                                            | $1.2 \pm 0.3$  | $1 \pm 0.3$           | $0.6 \pm 0.2$         |

Table S2. Summary of gene primers for L- and T-type voltage gated Ca<sup>2+</sup> channels

| Gene      | Primer sequence (5'-3')     | GenBank accession number |
|-----------|-----------------------------|--------------------------|
| Cacna1a-F | CCTCATCATCATCGGCTCCT        | NM_007578                |
| Cacna1a-R | CGCAAGAATCACCTCTTCTGC       | NM_007578                |
| Cacna1c-F | GTAAGGATGAGTGAAGAAGCCGAGTAC | NM_009781                |
| Cacna1c-R | CAGAGCGAAGGAAACTCCTCTTTGG   | NM_009781                |
| Cacna1d-F | ACCAAAGAAACAGAAGGCGG        | NM_028981                |
| Cacna1d-R | TGTAAACTGGGCACTCCTGA        | NM_028981                |
| Cacna1f-F | AGCCCTCCTCACTGTCTTTC        | NM_019582                |
| Cacna1f-R | TCAGCAGGATGTAGTTGCCA        | NM_019582                |
| Cacna1g-F | ACAACGGCATGGCCTCCACGT       | NM_009783                |
| Cacna1g-R | CCGTTTGCCGATTTCTCTGCGCTG    | NM_009783                |
| Cacna1h-F | TGGAGACCTACACAGGCCCGGT      | NM_021415                |
| Cacna1h-R | CAGAGAGCGGGGCGTATCC         | NM_021415                |
| Cacna1i-F | CTGTGCCTCGTTGTATAGC         | NM_001044308             |
| Cacna1i-R | ATCTCTCATAGCAGTCGCC         | NM_001044308             |

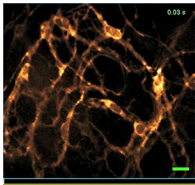

Video 1. **Ca<sup>2+</sup> waves propagating through an ICC-MY network in murine small intestine.** The video shows Ca<sup>2+</sup> waves propagating through an ICC-MY network in murine jejunum expressing the genetically encoded Ca<sup>2+</sup> indicator GCaMP3. The FOV shows a network of stellate-shaped ICC-MY imaged with a 20× objective. A brown hue was added as an overlay to enhance visualization; color scale indicates intensity of Ca<sup>2+</sup> transients (i.e., dark brown is low fluorescence; light yellow to white indicate high fluorescence levels). Video playback is set at 15 fps (approximately half the acquisition rate) to allow better visualization of Ca<sup>2+</sup> wave propagation. The green scale bar is 25 μm.

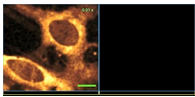

Video 2. **Spontaneous Ca<sup>2+</sup> transients in ICC-MY.** This video shows enhanced resolution of Ca<sup>2+</sup> transients in ICC-MY expressing the genetically encoded Ca<sup>2+</sup> indicator GCaMP3. The left FOV shows stellate-shaped ICC-MY imaged with a 60× objective. A brown hue was added as an overlay to enhance visualization; color scale indicates intensity of Ca<sup>2+</sup> transients (i.e., dark brown is low fluorescence; light yellow to white indicates high fluorescence levels). The green scale bar is 5 μm. The right FOV shows the Ca<sup>2+</sup> particle (PTCL) file, color coded in blue for raw PTCLs, and the centroids of particles are indicated in purple. Note the asynchronous, multiple-site firing of Ca<sup>2+</sup> transients in ICC-MY. The Ca<sup>2+</sup> transients were organized into CTCs, as explained in the Materials and methods and Results. CTCs originated after a short delay after the upstroke depolarization of slow waves, suggesting that Ca<sup>2+</sup> transients at multiple sites were entrained into CTCs by a voltage-dependent mechanism. The video shows several successive CTCs traversing the FOV. Asynchronous firing of Ca<sup>2+</sup> transients during CTCs results in sustained elevation of [Ca<sup>2+</sup>]<sub>i</sub> creating the plateau phase of slow waves. Video playback is set at 50 fps (approximately half the acquisition rate) to allow better visualization of CTCs.
